# Supplementary material
Source: publisher site journal article supplement (https://www.dovepress.com/article/328198)
Supplement: Supplementary file 1 [file get_supplementary_file.php]

**Supplementary materials**

MEDLINE search strategy:

"scirrhous"[All Fields] AND ("hepatocellular"[All Fields] OR "HCC"[All Fields])

Supplementary Table 1: methodological quality assessment

|  | Domain | Selection | Ascertainment | | Causality | | | | Reporting |
| --- | --- | --- | --- | --- | --- | --- | --- | --- | --- |
|  | Leading explanatory question | Patient(s) representative of the center’s experience | Exposure adequately ascertained | Outcome adequately ascertained* | Other causes of observation ruled out | Challenge/re-challenge phenomenon | Dose-response effect | Adequate follow-up | Sufficient details for replication or inference |
| Ariizumi 2002 (13) | Y | N | Y | Y | N | NA | NA | Y | Y |
| Choi 2018 (15) | Y | Y | Y | Y | N | NA | NA | N | Y |
| Chong, 2012 (16) | Y | N | N | Y | N | NA | NA | N | Y |
| Fujii, 2008 (17) | Y | Y | Y | Y | N | NA | NA | N | Y |
| Goshima, 2002 (18) | Y | N | Y | Y | N | NA | NA | N | Y |
| Hatano, 2019 (19) | Y | Y | Y | Y | N | NA | NA | N | Y |
| Jeon, 2010 (22) | Y | N | Y | Y | N | NA | NA | N | Y |
| Kim, 2014 (23) | Y | N | Y | Y | N | NA | NA | Y | Y |
| Kim, 2009 (24) | Y | Y | Y | Y | N | NA | NA | Y | Y |
| Kim, 2018 (26) | Y | N | N | Y | N | NA | NA | Y | Y |
| Kim, 2017 (27) | Y | N | Y | Y | N | NA | NA | Y | Y |
| Krings, 2013 (3) | Y | N | Y | Y | N | NA | NA | N | Y |
| Kurogi, 2006 (4) | Y | Y | N | Y | N | NA | NA | N | Y |
| Lee, 2012 (28) | Y | Y | Y | Y | N | NA | NA | Y | Y |
| Matsuura, 2005 (29) | Y | Y | Y | Y | N | NA | NA | Y | Y |
| Okamura, 2005 (30) | Y | Y | Y | Y | N | NA | NA | Y | Y |
| Oshima, 2012 (31) | Y | N | Y | Y | N | NA | NA | Y | Y |
| Park, 2013 (32) | Y | Y | Y | Y | N | NA | NA | N | Y |
| Sooklim, 2003 (33) | Y | N | N | Y | N | NA | NA | N | Y |
| Sugiki, 2004 (34) | Y | Y | N | Y | N | NA | NA | N | Y |
| Sugiki, 2009 (35) | Y | Y | Y | Y | N | NA | NA | Y | Y |
| Tefera, 2020 (36) | Y | Y | Y | Y | N | NA | NA | Y | Y |
| Yachida, 2009 (37) | Y | N | Y | Y | N | NA | NA | N | Y |
| Zakka, 2019 (38) | Y | Y | N | Y | N | NA | NA | Y | Y |
| Jayasinghe, 2014 (21) | Y | N | N | Y | N | NA | NA | N | Y |
| Chen, 2015 (14) | Y | N | Y | Y | N | NA | NA | Y | Y |
| Jakate, 2011 (20) | Y | N | Y | Y | N | NA | NA | N | Y |
| Masuda 1991 (39) | Y | N | N | Y | N | NA | NA | Y | Y |
| Izumi 2006 (40) | Y | N | N | Y | N | NA | NA | N | Y |
| Kim 2009 (25) | Y | N | Y | Y | N | NA | NA | N | Y |
| Huang 2021 (41) | Y | Y | N | Y | N | NA | NA | Y | Y |

As proposed by Murad et al (42) for case reports and case series
Y: Yes; N: No; NA: Not applicable *Each study was evaluated only for outcomes of the systematic review that it contributed to

Supplementary Table 2: MINORS

|  | A clearly stated aim | Inclusion of consecutive patients | Prospective collection of data | Endpoints appropriate to the aim of the study | Unbiased assessment of the study endpoint | Follow-up period appropriate to the aim of the study | Loss to follow-up less than 5% | Prospective calculation of the study size | **Total** |
| --- | --- | --- | --- | --- | --- | --- | --- | --- | --- |
| Seo-Youn Choi (15) | 2 | 2 | 1 | 2 | 2 | 2 | 0 | 1 | **11** |
| Chong (16) | 2 | 1 | 1 | 2 | 0 | 2 | 0 | 1 | **9** |
| Fujii (17) | 2 | 0 | 1 | 2 | 0 | 2 | 0 | 1 | **8** |
| Goshima (18) | 2 | 0 | 1 | 2 | 0 | 2 | 0 | 1 | **8** |
| Hatano (19) | 2 | 0 | 1 | 2 | 0 | 2 | 0 | 1 | **8** |
| Jeon (22) | 2 | 2 | 1 | 2 | 0 | 2 | 0 | 1 | **10** |
| Kim, 2014 (23) | 2 | 2 | 1 | 2 | 0 | 2 | 0 | 1 | **10** |
| Kim, 2009 (24) | 2 | 2 | 1 | 2 | 0 | 2 | 2 | 1 | **12** |
| Kim, 2017 (27) | 2 | 0 | 1 | 2 | 0 | 2 | 2 | 1 | **10** |
| Krings 2013 (3) | 2 | 0 | 1 | 2 | 0 | 2 | 0 | 1 | **8** |
| Kurogi, 2006 (4) | 2 | 2 | 1 | 2 | 0 | 2 | 0 | 1 | **10** |
| Lee, 2012 (28) | 2 | 2 | 1 | 2 | 0 | 2 | 2 | 1 | **12** |
| Matsuura, 2005 (29) | 2 | 0 | 1 | 2 | 0 | 2 | 1 | 1 | **9** |
| Okamura, 2005 (30) | 2 | 0 | 1 | 2 | 0 | 2 | 1 | 1 | **9** |
| Park, 2013 (32) | 2 | 0 | 1 | 2 | 0 | 0 | 0 | 1 | **6** |
| Sooklim, 2003 (33) | 2 | 1 | 1 | 2 | 0 | 2 | 0 | 1 | **9** |
| Sugiki, 2004 (34) | 2 | 0 | 1 | 2 | 0 | 2 | 0 | 1 | **8** |
| Sugiki, 2009 (35) | 2 | 0 | 1 | 2 | 0 | 2 | 0 | 1 | **8** |
| Tefera, 2020 (36) | 2 | 2 | 1 | 2 | 0 | 2 | 0 | 1 | **10** |
| Zakka, 2019 (38) | 2 | 0 | 1 | 2 | 0 | 2 | 0 | 0 | **7** |
| Huang 2021 (41) | 2 | 2 | 1 | 2 | 0 | 2 | 2 | 0 | **11** |

*The items are scored: 0 (not reported), 1 (reported but inadequate) or 2 (reported and adequate). The global ideal score being 16 for non-comparative studies.*
